# Supplementary material
Source: PubMed Central journal article supplement (PMC3920210)
Supplement: tableS2.pdf [file tableS2.pdf]

**Supplemental Table 2.** Enriched Gene Ontology (GO) categories in differentially up-regulated BALF proteins in HIV+ patients.

| Annotation         | Name                                                    | Category   | Number of Proteins | Fold Enrichment | Raw P-value | Adjusted P-value |
|--------------------|---------------------------------------------------------|------------|--------------------|-----------------|-------------|------------------|
| biological process | response to wounding                                    | GO:0009611 | 10                 | 11.16           | 5.40E-09    | 1.13E-06         |
| biological process | regulation of fibrinolysis                              | GO:0051917 | 3                  | 208.26          | 2.99E-07    | 2.60E-05         |
| biological process | acute inflammatory response                             | GO:0002526 | 5                  | 30.93           | 4.72E-07    | 2.60E-05         |
| biological process | response to external stimulus                           | GO:0009605 | 10                 | 6.91            | 4.98E-07    | 2.60E-05         |
| biological process | inflammatory response                                   | GO:0006954 | 7                  | 12.18           | 9.95E-07    | 4.16E-05         |
| biological process | blood coagulation, intrinsic pathway                    | GO:0007597 | 2                  | 624.78          | 2.45E-06    | 7.94E-05         |
| biological process | fibrinolysis                                            | GO:0042730 | 3                  | 104.13          | 2.88E-06    | 7.94E-05         |
| biological process | regulation of response to external stimulus             | GO:0032101 | 5                  | 21.25           | 3.04E-06    | 7.94E-05         |
| biological process | negative regulation of multicellular organismal process | GO:0051241 | 5                  | 20.03           | 4.06E-06    | 9.43E-05         |
| biological process | negative regulation of blood coagulation                | GO:0030195 | 3                  | 72.09           | 9.09E-06    | 2.00E-04         |
| biological process | negative regulation of coagulation                      | GO:0050819 | 3                  | 66.94           | 1.14E-05    | 2.00E-04         |
| biological process | positive regulation of fibrinolysis                     | GO:0051919 | 2                  | 312.39          | 1.47E-05    | 3.00E-04         |
| biological process | regulation of blood coagulation                         | GO:0030193 | 3                  | 53.55           | 2.27E-05    | 4.00E-04         |
| biological process | acute-phase response                                    | GO:0006953 | 3                  | 49.32           | 2.91E-05    | 4.00E-04         |
| biological process | regulation of coagulation                               | GO:0050818 | 3                  | 48.06           | 3.15E-05    | 4.00E-04         |
| biological process | plasminogen activation                                  | GO:0031639 | 2                  | 208.26          | 3.66E-05    | 4.00E-04         |
| biological process | negative regulation of fibrinolysis                     | GO:0051918 | 2                  | 208.26          | 3.66E-05    | 4.00E-04         |
| biological process | positive regulation of blood coagulation                | GO:0030194 | 2                  | 208.26          | 3.66E-05    | 4.00E-04         |
| biological process | regulation of response to stress                        | GO:0080134 | 5                  | 12.11           | 4.63E-05    | 5.00E-04         |
| biological process | defense response                                        | GO:0006952 | 7                  | 6.66            | 5.22E-05    | 5.00E-04         |
| biological process | regulation of response to stimulus                      | GO:0048583 | 6                  | 8.5             | 5.23E-05    | 5.00E-04         |
| biological process | positive regulation of coagulation                      | GO:0050820 | 2                  | 138.84          | 8.76E-05    | 8.00E-04         |
| biological process | zymogen activation                                      | GO:0031638 | 2                  | 124.96          | 1.00E-04    | 9.00E-04         |
| biological process | response to stress                                      | GO:0006950 | 10                 | 3.68            | 1.00E-04    | 9.00E-04         |
| biological process | immune system process                                   | GO:0002376 | 8                  | 4.69            | 2.00E-04    | 1.40E-03         |
| biological process | regulation of inflammatory response                     | GO:0050727 | 3                  | 26.4            | 2.00E-04    | 1.40E-03         |
| biological process | negative regulation of endothelial cell migration       | GO:0010596 | 2                  | 89.25           | 2.00E-04    | 1.40E-03         |
| biological process | wound healing                                           | GO:0042060 | 4                  | 12.88           | 2.00E-04    | 1.40E-03         |
| biological process | regeneration                                            | GO:0031099 | 3                  | 26.03           | 2.00E-04    | 1.40E-03         |
| biological process | protein maturation by peptide bond cleavage             | GO:0051605 | 3                  | 21.79           | 3.00E-04    | 2.00E-03         |
| biological process | regulation of multicellular organismal process          | GO:0051239 | 7                  | 4.95            | 3.00E-04    | 2.00E-03         |
| biological process | negative regulation of angiogenesis                     | GO:0016525 | 2                  | 54.33           | 6.00E-04    | 3.90E-03         |
| biological process | protein processing                                      | GO:0016485 | 3                  | 17.2            | 7.00E-04    | 4.20E-03         |
| biological process | blood coagulation                                       | GO:0007596 | 3                  | 16.59           | 7.00E-04    | 4.20E-03         |
| biological process | regulation of endothelial cell migration                | GO:0010594 | 2                  | 49.98           | 7.00E-04    | 4.20E-03         |
| biological process | protein maturation                                      | GO:0051604 | 3                  | 15.88           | 8.00E-04    | 4.50E-03         |
| biological process | coagulation                                             | GO:0050817 | 3                  | 16.16           | 8.00E-04    | 4.50E-03         |
| biological process | response to stimulus                                    | GO:0050896 | 13                 | 2.34            | 9.00E-04    | 4.80E-03         |
| biological process | hemostasis                                              | GO:0007599 | 3                  | 15.75           | 9.00E-04    | 4.80E-03         |
| biological process | tissue regeneration                                     | GO:0042246 | 2                  | 40.31           | 1.10E-03    | 5.70E-03         |
| molecular function | endopeptidase activity                                  | GO:0004175 | 5                  | 8.65            | 2.00E-04    | 8.40E-03         |
| molecular function | glycoprotein binding                                    | GO:0001948 | 2                  | 37.66           | 1.30E-03    | 1.31E-02         |
| molecular function | peptidase activity, acting on L-amino acid peptides     | GO:0070011 | 5                  | 5.86            | 1.30E-03    | 1.31E-02         |
| molecular function | peptidase activity                                      | GO:0008233 | 5                  | 5.69            | 1.50E-03    | 1.31E-02         |
| molecular function | serine-type endopeptidase activity                      | GO:0004252 | 3                  | 12.55           | 1.70E-03    | 1.31E-02         |
| molecular function | serine-type peptidase activity                          | GO:0008236 | 3                  | 10.85           | 2.50E-03    | 1.31E-02         |
| molecular function | SH3/SH2 adaptor activity                                | GO:0005070 | 2                  | 26.13           | 2.60E-03    | 1.31E-02         |
| molecular function | serine hydrolase activity                               | GO:0017171 | 3                  | 10.73           | 2.60E-03    | 1.31E-02         |
| molecular function | lipid binding                                           | GO:0008289 | 4                  | 6.62            | 2.80E-03    | 1.31E-02         |
| molecular function | steroid binding                                         | GO:0005496 | 2                  | 19.11           | 4.90E-03    | 1.87E-02         |
| molecular function | molecular adaptor activity                              | GO:0060090 | 2                  | 19.11           | 4.90E-03    | 1.87E-02         |
| molecular function | cysteine-type endopeptidase activity                    | GO:0004197 | 2                  | 18.03           | 5.40E-03    | 1.89E-02         |
| molecular function | enzyme inhibitor activity                               | GO:0004857 | 3                  | 7.14            | 8.20E-03    | 2.52E-02         |
| molecular function | enzyme regulator activity                               | GO:0030234 | 5                  | 3.83            | 8.40E-03    | 2.52E-02         |
| molecular function | protein binding, bridging                               | GO:0030674 | 2                  | 13.62           | 9.40E-03    | 2.63E-02         |
| molecular function | actin binding                                           | GO:0003779 | 3                  | 5.96            | 1.33E-02    | 3.49E-02         |
| molecular function | protein binding                                         | GO:0005515 | 18                 | 1.43            | 2.00E-02    | 4.71E-02         |
| molecular function | cysteine-type peptidase activity                        | GO:0008234 | 2                  | 9.08            | 2.02E-02    | 4.71E-02         |
| molecular function | endopeptidase inhibitor activity                        | GO:0004866 | 2                  | 8.77            | 2.16E-02    | 4.77E-02         |
| cellular component | extracellular region                                    | GO:0005576 | 18                 | 5.85            | 7.93E-12    | 2.93E-10         |
| cellular component | extracellular space                                     | GO:0005615 | 10                 | 9.63            | 2.66E-08    | 4.92E-07         |
| cellular component | extracellular region part                               | GO:0044421 | 10                 | 6.87            | 6.26E-07    | 7.72E-06         |
| cellular component | MHC class I protein complex                             | GO:0042612 | 2                  | 53.76           | 6.00E-04    | 5.60E-03         |
| cellular component | MHC protein complex                                     | GO:0042611 | 2                  | 33.95           | 1.60E-03    | 1.18E-02         |
