# Supplementary material
Source: PubMed Central journal article supplement (PMC3920210)
Supplement: tableS3.pdf [file tableS3.pdf]

**Supplemental Table 3.** Enriched Gene Ontology (GO) categories in differentially up-regulated BALF proteins in HIV- patients.

| Annotation         | Name                                                                  | Category   | Number of Proteins | Fold Enrichment | Raw P-value | Adjusted P-value |
|--------------------|-----------------------------------------------------------------------|------------|--------------------|-----------------|-------------|------------------|
| biological process | humoral immune response                                               | GO:0006959 | 6                  | 17.8            | 1.02E-06    | 2.00E-04         |
| biological process | response to wounding                                                  | GO:0009611 | 12                 | 5.4             | 1.55E-06    | 2.00E-04         |
| biological process | acute inflammatory response                                           | GO:0002526 | 6                  | 14.98           | 2.82E-06    | 3.00E-04         |
| biological process | response to stress                                                    | GO:0006950 | 20                 | 2.97            | 3.92E-06    | 3.00E-04         |
| biological process | complement activation, classical pathway                              | GO:0006958 | 4                  | 34.77           | 4.91E-06    | 3.00E-04         |
| biological process | hemostasis                                                            | GO:0007599 | 6                  | 12.71           | 7.30E-06    | 3.00E-04         |
| biological process | humoral immune response mediated by circulating immunoglobulin        | GO:0002455 | 4                  | 27.25           | 1.33E-05    | 5.00E-04         |
| biological process | complement activation                                                 | GO:0006956 | 4                  | 24.6            | 2.02E-05    | 7.00E-04         |
| biological process | activation of plasma proteins involved in acute inflammatory response | GO:0002541 | 4                  | 22.92           | 2.68E-05    | 8.00E-04         |
| biological process | regulation of body fluid levels                                       | GO:0050878 | 6                  | 9.95            | 2.95E-05    | 8.00E-04         |
| biological process | response to external stimulus                                         | GO:0009605 | 13                 | 3.63            | 4.07E-05    | 1.00E-03         |
| biological process | protein folding                                                       | GO:0006457 | 6                  | 8.95            | 5.35E-05    | 1.30E-03         |
| biological process | innate immune response                                                | GO:0045087 | 6                  | 8.59            | 6.70E-05    | 1.40E-03         |
| biological process | protein processing                                                    | GO:0016485 | 5                  | 11.56           | 7.01E-05    | 1.40E-03         |
| biological process | blood coagulation                                                     | GO:0007596 | 5                  | 11.16           | 8.32E-05    | 1.60E-03         |
| biological process | coagulation                                                           | GO:0050817 | 5                  | 10.87           | 9.42E-05    | 1.60E-03         |
| biological process | protein maturation                                                    | GO:0051604 | 5                  | 10.68           | 1.00E-04    | 1.60E-03         |
| biological process | wound healing                                                         | GO:0042060 | 6                  | 7.8             | 1.00E-04    | 1.60E-03         |
| biological process | defense response                                                      | GO:0006952 | 10                 | 3.84            | 2.00E-04    | 2.70E-03         |
| biological process | B cell mediated immunity                                              | GO:0019724 | 4                  | 14.41           | 2.00E-04    | 2.70E-03         |
| biological process | immunoglobulin mediated immune response                               | GO:0016064 | 4                  | 14.61           | 2.00E-04    | 2.70E-03         |
| biological process | protein maturation by peptide bond cleavage                           | GO:0051605 | 4                  | 11.73           | 4.00E-04    | 5.10E-03         |
| biological process | cellular anion homeostasis                                            | GO:0030002 | 2                  | 56.02           | 5.00E-04    | 5.90E-03         |
| biological process | inflammatory response                                                 | GO:0006954 | 7                  | 4.92            | 5.00E-04    | 5.90E-03         |
| biological process | activation of immune response                                         | GO:0002253 | 4                  | 10.08           | 7.00E-04    | 7.60E-03         |
| biological process | immune response                                                       | GO:0006955 | 10                 | 3.36            | 7.00E-04    | 7.60E-03         |
| biological process | response to stimulus                                                  | GO:0050896 | 25                 | 1.82            | 8.00E-04    | 7.80E-03         |
| biological process | lymphocyte mediated immunity                                          | GO:0002449 | 4                  | 9.51            | 8.00E-04    | 7.80E-03         |
| biological process | immune system process                                                 | GO:0002376 | 12                 | 2.84            | 8.00E-04    | 7.80E-03         |
| biological process | anion homeostasis                                                     | GO:0055081 | 2                  | 42.02           | 1.00E-03    | 8.80E-03         |
| biological process | adaptive immune response                                              | GO:0002250 | 4                  | 8.92            | 1.00E-03    | 8.80E-03         |
| biological process | immune effector process                                               | GO:0002252 | 5                  | 6.3             | 1.20E-03    | 1.00E-02         |
| biological process | membrane organization                                                 | GO:0016044 | 7                  | 4.28            | 1.20E-03    | 1.00E-02         |
| biological process | protein metabolic process                                             | GO:0019538 | 22                 | 1.87            | 1.40E-03    | 1.13E-02         |
| biological process | leukocyte mediated immunity                                           | GO:0002443 | 4                  | 8               | 1.60E-03    | 1.26E-02         |
| biological process | regulation of immune response                                         | GO:0050776 | 5                  | 5.78            | 1.70E-03    | 1.30E-02         |
| biological process | positive regulation of immune response                                | GO:0050778 | 4                  | 7.1             | 2.40E-03    | 1.79E-02         |
| biological process | hexose metabolic process                                              | GO:0019318 | 4                  | 6               | 4.40E-03    | 3.19E-02         |
| biological process | cellular iron ion homeostasis                                         | GO:0006879 | 2                  | 17.39           | 5.90E-03    | 4.17E-02         |
| molecular function | unfolded protein binding                                              | GO:0051082 | 6                  | 13.83           | 4.54E-06    | 3.00E-04         |
| molecular function | endopeptidase inhibitor activity                                      | GO:0004866 | 5                  | 8.92            | 2.00E-04    | 7.30E-03         |
| molecular function | peptidase inhibitor activity                                          | GO:0030414 | 5                  | 8.45            | 3.00E-04    | 7.30E-03         |
| molecular function | calcium-dependent cysteine-type endopeptidase activity                | GO:0004198 | 2                  | 32.55           | 1.70E-03    | 2.77E-02         |
| molecular function | eukaryotic cell surface binding                                       | GO:0043499 | 2                  | 30.64           | 1.90E-03    | 2.77E-02         |
| molecular function | purine ribonucleotide binding                                         | GO:0032555 | 15                 | 2.15            | 3.00E-03    | 3.13E-02         |
| molecular function | ribonucleotide binding                                                | GO:0032553 | 15                 | 2.15            | 3.00E-03    | 3.13E-02         |
| molecular function | enzyme inhibitor activity                                             | GO:0004857 | 5                  | 4.84            | 3.70E-03    | 3.38E-02         |
| molecular function | purine nucleotide binding                                             | GO:0017076 | 15                 | 2.06            | 4.50E-03    | 3.65E-02         |
| molecular function | cell surface binding                                                  | GO:0043498 | 2                  | 17.96           | 5.50E-03    | 3.65E-02         |
| molecular function | protein binding                                                       | GO:0005515 | 41                 | 1.33            | 5.50E-03    | 3.65E-02         |
| cellular component | cytosol                                                               | GO:0005829 | 20                 | 4.45            | 5.69E-09    | 4.89E-07         |
| cellular component | cytoplasmic membrane-bounded vesicle                                  | GO:0016023 | 12                 | 6.21            | 3.62E-07    | 9.59E-06         |
| cellular component | cytoplasm                                                             | GO:0005737 | 45                 | 1.73            | 3.86E-07    | 9.59E-06         |
| cellular component | membrane-bounded vesicle                                              | GO:0031988 | 12                 | 6.01            | 5.15E-07    | 9.59E-06         |
| cellular component | pigment granule                                                       | GO:0048770 | 6                  | 19.18           | 6.69E-07    | 9.59E-06         |
| cellular component | melanosome                                                            | GO:0042470 | 6                  | 19.18           | 6.69E-07    | 9.59E-06         |
| cellular component | chaperonin-containing T-complex                                       | GO:0005832 | 3                  | 119.17          | 1.53E-06    | 1.88E-05         |
| cellular component | cytoplasmic vesicle                                                   | GO:0031410 | 12                 | 5.31            | 1.89E-06    | 2.03E-05         |
| cellular component | vesicle                                                               | GO:0031982 | 12                 | 5.09            | 2.92E-06    | 2.79E-05         |
| cellular component | cytoplasmic part                                                      | GO:0044444 | 33                 | 1.92            | 1.34E-05    | 1.00E-04         |
| cellular component | platelet alpha granule                                                | GO:0031091 | 4                  | 21.39           | 3.58E-05    | 3.00E-04         |
| cellular component | cytoplasmic vesicle part                                              | GO:0044433 | 6                  | 9.43            | 4.05E-05    | 3.00E-04         |
| cellular component | fibrinogen complex                                                    | GO:0005577 | 2                  | 79.44           | 3.00E-04    | 2.00E-03         |
| cellular component | platelet alpha granule lumen                                          | GO:0031093 | 3                  | 20.35           | 4.00E-04    | 2.50E-03         |
| cellular component | cytoplasmic membrane-bounded vesicle lumen                            | GO:0060205 | 3                  | 18.96           | 5.00E-04    | 2.90E-03         |
| cellular component | vesicle lumen                                                         | GO:0031983 | 3                  | 18.13           | 6.00E-04    | 3.20E-03         |
| cellular component | external side of plasma membrane                                      | GO:0009897 | 4                  | 8.49            | 1.30E-03    | 6.60E-03         |
| cellular component | secretory granule                                                     | GO:0030141 | 4                  | 6.39            | 3.50E-03    | 1.55E-02         |
| cellular component | extracellular region                                                  | GO:0005576 | 15                 | 2.1             | 3.60E-03    | 1.55E-02         |
| cellular component | brush border membrane                                                 | GO:0031526 | 2                  | 22.24           | 3.60E-03    | 1.55E-02         |
| cellular component | Golgi-associated vesicle membrane                                     | GO:0030660 | 2                  | 19.86           | 4.50E-03    | 1.84E-02         |
| cellular component | cell surface                                                          | GO:0009986 | 5                  | 4.56            | 4.70E-03    | 1.84E-02         |
| cellular component | plasma membrane part                                                  | GO:0044459 | 14                 | 2.03            | 6.90E-03    | 2.58E-02         |
| cellular component | vesicle coat                                                          | GO:0030120 | 2                  | 14.63           | 8.20E-03    | 2.94E-02         |
| cellular component | intrinsic to plasma membrane                                          | GO:0031226 | 10                 | 2.31            | 1.02E-02    | 3.44E-02         |
| cellular component | brush border                                                          | GO:0005903 | 2                  | 12.93           | 1.04E-02    | 3.44E-02         |
| cellular component | cytoplasmic vesicle membrane                                          | GO:0030659 | 3                  | 6.47            | 1.12E-02    | 3.47E-02         |
| cellular component | cell fraction                                                         | GO:0000267 | 9                  | 2.41            | 1.13E-02    | 3.47E-02         |
| cellular component | membrane raft                                                         | GO:0045121 | 3                  | 6.37            | 1.17E-02    | 3.47E-02         |
| cellular component | Golgi-associated vesicle                                              | GO:0005798 | 2                  | 11.35           | 1.34E-02    | 3.84E-02         |
| cellular component | vesicle membrane                                                      | GO:0012506 | 3                  | 5.92            | 1.42E-02    | 3.94E-02         |
| cellular component | cytosolic part                                                        | GO:0044445 | 3                  | 5.71            | 1.56E-02    | 4.19E-02         |
| cellular component | intracellular part                                                    | GO:0044424 | 46                 | 1.21            | 1.64E-02    | 4.27E-02         |
| cellular component | intracellular                                                         | GO:0005622 | 47                 | 1.19            | 1.86E-02    | 4.70E-02         |
| cellular component | cell projection membrane                                              | GO:0031253 | 2                  | 8.97            | 2.09E-02    | 4.86E-02         |
| cellular component | membrane coat                                                         | GO:0030117 | 2                  | 8.97            | 2.09E-02    | 4.86E-02         |
| cellular component | coated membrane                                                       | GO:0048475 | 2                  | 8.97            | 2.09E-02    | 4.86E-02         |
| cellular component | soluble fraction                                                      | GO:0005625 | 4                  | 3.74            | 2.20E-02    | 4.98E-02         |
