# Supplementary material
Source: PubMed Central journal article supplement (PMC3920210)
Supplement: tableS4.pdf [file tableS4.pdf]

**Supplemental Table 4.** Enriched Gene Ontology (GO) categories in differentially up-regulated BALF proteins in HIV+ patients relative to the entire BALF proteome.

| Annotation         | Name                                                                               | Category   | Number of Proteins | Fold Enrichment | P-value  |
|--------------------|------------------------------------------------------------------------------------|------------|--------------------|-----------------|----------|
| biological process | positive regulation of multicellular organismal process                            | GO:0051240 | 28                 | 6.36            | 2.00E-04 |
| biological process | positive regulation of coagulation                                                 | GO:0050820 | 6                  | 14.83           | 6.00E-04 |
| biological process | regulation of fibrinolysis                                                         | GO:0051917 | 6                  | 14.83           | 6.00E-04 |
| biological process | positive regulation of blood coagulation                                           | GO:0030194 | 6                  | 14.83           | 6.00E-04 |
| biological process | positive regulation of hemostasis                                                  | GO:1900048 | 6                  | 14.83           | 6.00E-04 |
| biological process | negative regulation of multicellular organismal process                            | GO:0051241 | 37                 | 4.81            | 9.00E-04 |
| biological process | antigen processing and presentation of exogenous peptide antigen via MHC class I   | GO:002480  | 2                  | 29.67           | 1.10E-03 |
| biological process | regeneration                                                                       | GO:0031099 | 16                 | 7.42            | 1.40E-03 |
| biological process | response to wounding                                                               | GO:0009611 | 133                | 2.45            | 1.80E-03 |
| biological process | acute inflammatory response                                                        | GO:002526  | 29                 | 5.11            | 1.90E-03 |
| biological process | fibrinolysis                                                                       | GO:0042730 | 9                  | 9.89            | 2.50E-03 |
| biological process | regulation of response to stress                                                   | GO:0080134 | 78                 | 3.04            | 2.50E-03 |
| biological process | positive regulation of fibrinolysis                                                | GO:0051919 | 3                  | 19.78           | 3.20E-03 |
| biological process | regulation of response to external stimulus                                        | GO:0032101 | 48                 | 3.71            | 3.60E-03 |
| biological process | inflammatory response                                                              | GO:0006954 | 67                 | 3.1             | 4.50E-03 |
| biological process | acute-phase response                                                               | GO:0006953 | 11                 | 8.09            | 4.70E-03 |
| biological process | negative regulation of hemostasis                                                  | GO:1900047 | 12                 | 7.42            | 6.10E-03 |
| biological process | negative regulation of blood coagulation                                           | GO:0030195 | 12                 | 7.42            | 6.10E-03 |
| biological process | plasminogen activation                                                             | GO:0031639 | 4                  | 14.83           | 6.30E-03 |
| biological process | negative regulation of fibrinolysis                                                | GO:0051918 | 4                  | 14.83           | 6.30E-03 |
| biological process | negative regulation of coagulation                                                 | GO:0050819 | 13                 | 6.85            | 7.70E-03 |
| biological process | regulation of defense response                                                     | GO:0031347 | 58                 | 3.07            | 9.50E-03 |
| biological process | regulation of wound healing                                                        | GO:0061041 | 14                 | 6.36            | 9.60E-03 |
| biological process | regulation of hemostasis                                                           | GO:1900046 | 14                 | 6.36            | 9.60E-03 |
| biological process | regulation of sequence-specific DNA binding transcription factor activity          | GO:0051090 | 14                 | 6.36            | 9.60E-03 |
| biological process | regulation of blood coagulation                                                    | GO:0030193 | 14                 | 6.36            | 9.60E-03 |
| biological process | negative regulation of sequence-specific DNA binding transcription factor activity | GO:0043433 | 5                  | 11.87           | 1.02E-02 |
| biological process | interferon-gamma production                                                        | GO:0032609 | 5                  | 11.87           | 1.02E-02 |
| biological process | vitamin transport                                                                  | GO:0051180 | 5                  | 11.87           | 1.02E-02 |
| biological process | zymogen activation                                                                 | GO:0031638 | 5                  | 11.87           | 1.02E-02 |
| biological process | regulation of interferon-gamma production                                          | GO:0032649 | 5                  | 11.87           | 1.02E-02 |
| biological process | regulation of coagulation                                                          | GO:0050818 | 15                 | 5.93            | 1.17E-02 |
| biological process | negative regulation of cell proliferation                                          | GO:0008285 | 28                 | 4.24            | 1.18E-02 |
| biological process | positive regulation of adaptive immune response                                    | GO:002821  | 6                  | 9.89            | 1.50E-02 |
| biological process | tissue regeneration                                                                | GO:0042246 | 6                  | 9.89            | 1.50E-02 |
| biological process | pinocytosis                                                                        | GO:0006907 | 6                  | 9.89            | 1.50E-02 |
| biological process | defense response                                                                   | GO:0006952 | 149                | 1.99            | 1.56E-02 |
| biological process | posttranscriptional regulation of gene expression                                  | GO:0010608 | 31                 | 3.83            | 1.70E-02 |
| biological process | protein processing                                                                 | GO:0016485 | 18                 | 4.94            | 1.97E-02 |
| biological process | blood coagulation, intrinsic pathway                                               | GO:0007597 | 7                  | 8.48            | 2.06E-02 |
| molecular function | signaling adaptor activity                                                         | GO:0035591 | 3                  | 20.64           | 2.90E-03 |
| molecular function | SH3/SH2 adaptor activity                                                           | GO:0005070 | 3                  | 20.64           | 2.90E-03 |
| molecular function | endopeptidase activity                                                             | GO:0004175 | 44                 | 3.52            | 1.04E-02 |
| molecular function | serine-type endopeptidase activity                                                 | GO:0004252 | 20                 | 4.64            | 2.35E-02 |
| molecular function | alcohol binding                                                                    | GO:0043178 | 8                  | 7.74            | 2.48E-02 |
| molecular function | protein domain specific binding                                                    | GO:0019904 | 23                 | 4.04            | 3.42E-02 |
| molecular function | serine hydrolase activity                                                          | GO:0017171 | 23                 | 4.04            | 3.42E-02 |
| molecular function | serine-type peptidase activity                                                     | GO:0008236 | 23                 | 4.04            | 3.42E-02 |
| molecular function | peptidase activity, acting on L-amino acid peptides                                | GO:0070011 | 59                 | 2.62            | 3.46E-02 |
| molecular function | cysteine-type endopeptidase activity                                               | GO:0004197 | 10                 | 6.19            | 3.84E-02 |
| molecular function | peptidase activity                                                                 | GO:0008233 | 61                 | 2.54            | 3.94E-02 |
| molecular function | glycoprotein binding                                                               | GO:0001948 | 11                 | 5.63            | 4.60E-02 |
| molecular function | binding, bridging                                                                  | GO:0060090 | 11                 | 5.63            | 4.60E-02 |
| molecular function | protein binding, bridging                                                          | GO:0030674 | 11                 | 5.63            | 4.60E-02 |
| molecular function | steroid binding                                                                    | GO:0005496 | 11                 | 5.63            | 4.60E-02 |
| cellular component | extracellular region                                                               | GO:0005576 | 213                | 2.5             | 6.42E-06 |
| cellular component | extracellular space                                                                | GO:0005615 | 118                | 2.76            | 7.00E-04 |
| cellular component | MHC class I protein complex                                                        | GO:0042612 | 2                  | 29.64           | 1.10E-03 |
| cellular component | extracellular region part                                                          | GO:0044421 | 134                | 2.43            | 2.00E-03 |
| cellular component | endosome lumen                                                                     | GO:0031904 | 4                  | 14.82           | 6.30E-03 |
| cellular component | MHC protein complex                                                                | GO:0042611 | 4                  | 14.82           | 6.30E-03 |
