# Supplementary material
Source: PubMed Central journal article supplement (PMC3920210)
Supplement: tableS5.pdf [file tableS5.pdf]

**Supplemental Table 5.** Enriched Gene Ontology (GO) categories in differentially up-regulated BALF proteins in HIV- patients relative to the entire BALF proteome.

| Annotation         | Name                                                             | Category   | Number of Proteins | Fold Enrichment | P-value  |
|--------------------|------------------------------------------------------------------|------------|--------------------|-----------------|----------|
| biological process | negative regulation of ERBB signaling pathway                    | GO:1901185 | 5                  | 7.24            | 4.80E-03 |
| biological process | regulation of protein activation cascade                         | GO:2000257 | 10                 | 4.83            | 6.10E-03 |
| biological process | regulation of complement activation                              | GO:0030449 | 10                 | 4.83            | 6.10E-03 |
| biological process | establishment of protein localization to vacuole                 | GO:0072666 | 2                  | 12.07           | 6.80E-03 |
| biological process | anion homeostasis                                                | GO:0055081 | 2                  | 12.07           | 6.80E-03 |
| biological process | protein localization to vacuole                                  | GO:0072665 | 2                  | 12.07           | 6.80E-03 |
| biological process | protein targeting to vacuole                                     | GO:0006623 | 2                  | 12.07           | 6.80E-03 |
| biological process | cellular anion homeostasis                                       | GO:0030002 | 2                  | 12.07           | 6.80E-03 |
| biological process | protein targeting to lysosome                                    | GO:0006622 | 2                  | 12.07           | 6.80E-03 |
| biological process | regulation of epidermal growth factor receptor signaling pathway | GO:0042058 | 6                  | 6.03            | 9.00E-03 |
| biological process | 'de novo' posttranslational protein folding                      | GO:0051084 | 11                 | 4.39            | 9.00E-03 |
| biological process | regulation of ERBB signaling pathway                             | GO:1901184 | 6                  | 6.03            | 9.00E-03 |
| biological process | protein processing                                               | GO:0016485 | 18                 | 3.35            | 1.22E-02 |
| biological process | regulation of humoral immune response                            | GO:0002920 | 12                 | 4.02            | 1.27E-02 |
| biological process | purine ribonucleotide metabolic process                          | GO:0009150 | 41                 | 2.35            | 1.48E-02 |
| biological process | humoral immune response                                          | GO:0006959 | 34                 | 2.48            | 1.70E-02 |
| biological process | 'de novo' protein folding                                        | GO:0006458 | 13                 | 3.71            | 1.73E-02 |
| biological process | regulation of protein processing                                 | GO:0070613 | 13                 | 3.71            | 1.73E-02 |
| biological process | regulation of lipid kinase activity                              | GO:0043550 | 3                  | 8.05            | 1.92E-02 |
| biological process | positive regulation of lipid kinase activity                     | GO:0090218 | 3                  | 8.05            | 1.92E-02 |
| biological process | lysosomal transport                                              | GO:0007041 | 3                  | 8.05            | 1.92E-02 |
| biological process | ribonucleotide metabolic process                                 | GO:0009259 | 43                 | 2.25            | 1.97E-02 |
| biological process | purine ribonucleoside triphosphate metabolic process             | GO:0009205 | 35                 | 2.41            | 1.98E-02 |
| biological process | purine nucleoside triphosphate metabolic process                 | GO:0009144 | 35                 | 2.41            | 1.98E-02 |
| biological process | nucleoside triphosphate metabolic process                        | GO:0009141 | 35                 | 2.41            | 1.98E-02 |
| biological process | ribonucleoside triphosphate metabolic process                    | GO:0009199 | 35                 | 2.41            | 1.98E-02 |
| biological process | regulation of acute inflammatory response                        | GO:0002673 | 14                 | 3.45            | 2.27E-02 |
| biological process | protein maturation                                               | GO:0051604 | 21                 | 2.87            | 2.38E-02 |
| biological process | ribonucleoside triphosphate catabolic process                    | GO:0009203 | 29                 | 2.5             | 2.63E-02 |
| biological process | nucleoside triphosphate catabolic process                        | GO:0009143 | 29                 | 2.5             | 2.63E-02 |
| biological process | purine ribonucleoside triphosphate catabolic process             | GO:0009207 | 29                 | 2.5             | 2.63E-02 |
| biological process | purine nucleoside triphosphate catabolic process                 | GO:0009146 | 29                 | 2.5             | 2.63E-02 |
| biological process | acute inflammatory response                                      | GO:0002526 | 29                 | 2.5             | 2.63E-02 |
| biological process | ribose phosphate metabolic process                               | GO:0019693 | 46                 | 2.1             | 2.90E-02 |
| biological process | purine ribonucleotide catabolic process                          | GO:0009154 | 30                 | 2.41            | 3.08E-02 |
| biological process | ribonucleotide catabolic process                                 | GO:0009261 | 30                 | 2.41            | 3.08E-02 |
| biological process | activation of protein kinase activity                            | GO:0032147 | 9                  | 4.02            | 3.17E-02 |
| biological process | DNA repair                                                       | GO:0006281 | 9                  | 4.02            | 3.17E-02 |
| biological process | purine nucleoside catabolic process                              | GO:0006152 | 31                 | 2.34            | 3.58E-02 |
| molecular function | unfolded protein binding                                         | GO:0051082 | 23                 | 3.15            | 8.30E-03 |
| molecular function | transferase activity, transferring one-carbon groups             | GO:0016741 | 3                  | 8.05            | 1.92E-02 |
| molecular function | calcium-dependent cysteine-type endopeptidase activity           | GO:0004198 | 3                  | 8.05            | 1.92E-02 |
| molecular function | alkali metal ion binding                                         | GO:0031420 | 3                  | 8.05            | 1.92E-02 |
| molecular function | cargo receptor activity                                          | GO:0038024 | 9                  | 4.02            | 3.17E-02 |
| molecular function | cytokine activity                                                | GO:0005125 | 4                  | 6.03            | 3.63E-02 |
| cellular component | intrinsic to plasma membrane                                     | GO:0031226 | 50                 | 2.47            | 4.40E-03 |
| cellular component | plasma membrane part                                             | GO:0044459 | 105                | 1.88            | 5.80E-03 |
| cellular component | centrosome                                                       | GO:0005813 | 22                 | 3.37            | 5.90E-03 |
| cellular component | microtubule organizing center                                    | GO:0005815 | 29                 | 2.98            | 6.10E-03 |
| cellular component | external side of plasma membrane                                 | GO:0009897 | 23                 | 3.22            | 7.40E-03 |
| cellular component | plasma membrane                                                  | GO:0005886 | 223                | 1.5             | 7.80E-03 |
| cellular component | chaperonin-containing T-complex                                  | GO:0005832 | 6                  | 6.17            | 8.50E-03 |
| cellular component | membrane raft                                                    | GO:0045121 | 12                 | 4.12            | 1.18E-02 |
| cellular component | integral to plasma membrane                                      | GO:0005887 | 49                 | 2.27            | 1.26E-02 |
| cellular component | cell periphery                                                   | GO:0071944 | 236                | 1.41            | 1.80E-02 |
| cellular component | fibrinogen complex                                               | GO:0005577 | 3                  | 8.23            | 1.84E-02 |
| cellular component | brush border membrane                                            | GO:0031526 | 3                  | 8.23            | 1.84E-02 |
| cellular component | microtubule cytoskeleton                                         | GO:0015630 | 58                 | 1.92            | 3.62E-02 |
| cellular component | cytoplasmic membrane-bounded vesicle lumen                       | GO:0060205 | 17                 | 2.91            | 4.16E-02 |
| cellular component | membrane                                                         | GO:0016020 | 325                | 1.25            | 4.71E-02 |
